# Supplementary material
Source: ML conference proceedings conference paper supplement (https://www.ecva.net/papers/eccv_2022/papers_ECCV/html/136790454_ECCV_2022_paper.php)
Supplement: Supplementary file 1 [file 136790454-supp.pdf]

# Supplementary for Image Super-Resolution with Deep Dictionary

Shunta Maeda

Navier Inc.  
shunta@navier.co.jp

## 1 More Training Details

**Learning rate** Different learning rates are employed for the high-resolution dictionary  $D_H$  and the rest of the network. When  $D_H$  was trained at the same low learning rate as the others, the atoms remained in their initial state and were hardly updated.

**Augmentations** Following previous studies, random flipping and rotation augmentation is applied to each training sample. We also tried color augmentations of blend and RGB permute [1]; however, performance did not improve.

**Validation** Initial ten images from the DIV2K validation dataset are used for validation. To reduce the validation cost, a  $256 \times 256$  ( $128 \times 128$ ) region of each image is cropped to input the  $\times 4$  ( $\times 8$ ) model. The weight that maximizes the validation score was used for all evaluations.

**Residual learning** In SRDD, it is important to learn residuals from upsampled input images. Attempting to reconstruct the image directly instead of learning the residuals made the training unstable and resulted in significant performance degradation.

**Evolution of atoms** Figure 1 shows evolution of atoms during training. We observed that the contrast of the output atoms became stronger as training progressed, and they were almost fixed in the latter half of the training.

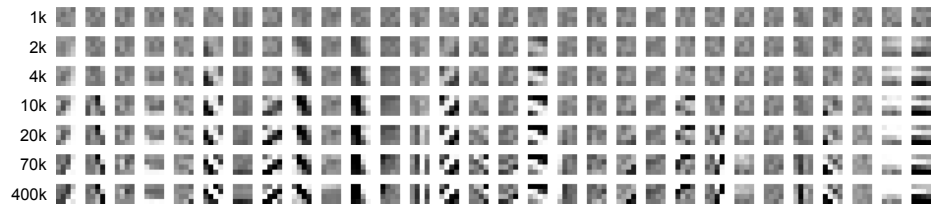

**Fig. 1.** Evolution of atoms during training of  $\times 4$  SRDD with  $N = 64$ . The 30 atoms under the training from 1k to 400k iterations are displayed. The data range is renormalized to  $[0, 1]$  for visualization.

## References

1. Yoo, J., Ahn, N., Sohn, K.A.: Rethinking data augmentation for image super-resolution: A comprehensive analysis and a new strategy. In: CVPR (2020)
